# Supplementary material
Source: publisher figshare collection journal article supplement (https://frontiersin.figshare.com/ndownloader/files/13756436)

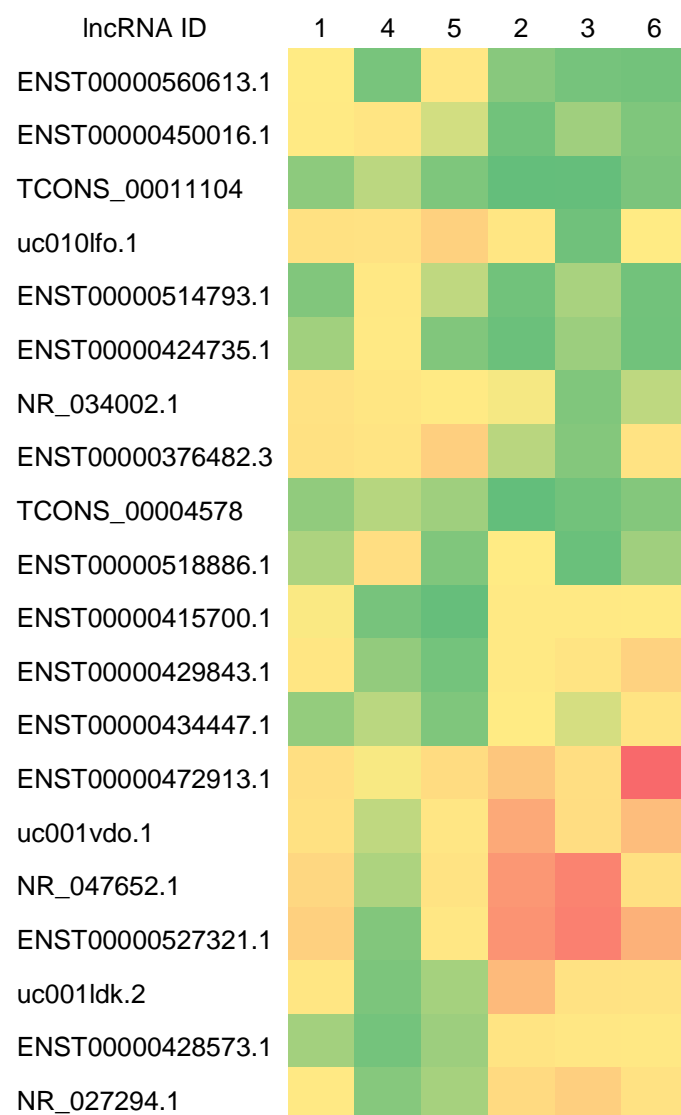

Supplement: Supplementary file 2 [file 13756436]
